# Supplementary material for: Photochromism and fluorescence modulation of pyrazolone derivatives in the solid state
Source: Royal Society of Chemistry journal article supplement (doi:10.1039/c4nj01970a), 2015-01-01
Supplement: c4nj01970a1.pdf [file c4nj01970a1.pdf]

Supplementary Material (ESI) for New Journal of Chemistry  
This journal is © The Royal Society of Chemistry 2014

## **Electronic Supplementary Information (ESI)**

# **Photochromism and fluorescence modulation of pyrazolone derivatives in the solid state**

**Jixi Guo, Li Liu, Dianzeng Jia,\* Mingxi Guo, Yucai Zhang and Xianli Song**

*Key laboratory of material and technology for clean energy, ministry of education;*

*Key laboratory of advanced functional materials, autonomous region; Institute of*

*Applied Chemistry, Xinjiang University, Urumqi 830046, Xinjiang, P. R. China*

Corresponding author: Tel.: +86-991-8583083; Fax: +86-991-8588883; E-mail

address: [jdz0991@gmail.com](mailto:jdz0991@gmail.com)

**Table S1.** Crystal data and structure refinement for **1**.

|                                                      |                                                                                                                                            |
|------------------------------------------------------|--------------------------------------------------------------------------------------------------------------------------------------------|
| Empirical formula                                    | C <sub>26</sub> H <sub>19</sub> N <sub>5</sub> F <sub>6</sub> SO • CH <sub>3</sub> CH <sub>2</sub> OH                                      |
| Formula weight                                       | 609.59                                                                                                                                     |
| Temperature                                          | 293(2) K                                                                                                                                   |
| Wavelength                                           | 0.71073 Å                                                                                                                                  |
| Crystal system                                       | Monoclinic                                                                                                                                 |
| Space group                                          | <i>P2(1)/c</i>                                                                                                                             |
| Unit cell dimensions                                 | <i>a</i> = 8.2512(3) Å <i>α</i> = 90.00°<br><i>b</i> = 30.1101(10) Å <i>β</i> = 102.2120(10)°<br><i>c</i> = 11.6340(5) Å <i>γ</i> = 90.00° |
| Volume                                               | 2825.00(18) Å <sup>3</sup>                                                                                                                 |
| <i>Z</i>                                             | 4                                                                                                                                          |
| Calculated density                                   | 1.433 mg/m <sup>3</sup>                                                                                                                    |
| Absorption coefficient                               | 1.90 mm <sup>-1</sup>                                                                                                                      |
| <i>F</i> (000)                                       | 1256                                                                                                                                       |
| Crystal size                                         | 0.54 × 0.39 × 0.15 mm                                                                                                                      |
| Theta range for data collection                      | 3.08–25.50°                                                                                                                                |
| Limiting indices                                     | −9 ≤ <i>h</i> ≤ 9, −36 ≤ <i>k</i> ≤ 36, −14 ≤ <i>l</i> ≤ 14                                                                                |
| Reflections collected / unique                       | 23076 / 5230 [ <i>R</i> <sub>int</sub> = 0.0370]                                                                                           |
| Absorption correction                                | Empirical                                                                                                                                  |
| Max. and min. transmission                           | 0.922 and 0.968                                                                                                                            |
| Refinement method                                    | Full-matrix least-squares on <i>F</i> <sup>2</sup>                                                                                         |
| Data / restraints / parameters                       | 5230 / 5 / 392                                                                                                                             |
| Goodness-of-fit on <i>F</i> <sup>2</sup>             | 1.080                                                                                                                                      |
| Final <i>R</i> indices [ <i>I</i> > 2 σ( <i>I</i> )] | <i>R</i> <sub>1</sub> = 0.0716, <i>wR</i> <sub>2</sub> = 0.1338                                                                            |
| <i>R</i> indices (all data)                          | <i>R</i> <sub>1</sub> = 0.1092, <i>wR</i> <sub>2</sub> = 0.1559                                                                            |
| Extinction coefficient                               | 0.0066(5)                                                                                                                                  |
| Largest diff. peak and hole                          | 0.595 and -0.499 e Å <sup>-3</sup>                                                                                                         |

**Table S2.** Selected Bond Lengths (Å) and Bond Angles (°) of B

|                |          |                 |          |
|----------------|----------|-----------------|----------|
| S–C(23)        | 1.675(4) | N(3)–C(16)      | 1.306(4) |
| O–C(7)         | 1.256(4) | N(3)–N(4)       | 1.377(4) |
| N(1)–N(2)      | 1.385(4) | N(4)–C(23)      | 1.369(5) |
| N(1)–C(7)      | 1.391(4) | N(5)–C(23)      | 1.315(5) |
| N(1)–C(6)      | 1.418(4) | N(5)–C(24)      | 1.458(5) |
| N(2)–C(9)      | 1.349(4) |                 |          |
| N(2)–N(1)–C(7) | 108.6(3) | N(2)–C(9)–C(8)  | 109.4(3) |
| N(2)–N(1)–C(6) | 121.2(3) | N(2)–C(9)–C(10) | 119.5(3) |
| C(7)–N(1)–C(6) | 127.6(3) | N(5)–C(18)–N(4) | 116.7(3) |
| C(9)–N(2)–N(1) | 108.8(3) | N(5)–C(18)–S    | 124.6(3) |
| N(1)–C(7)–C(8) | 106.6(3) | N(4)–C(18)–S    | 118.7(3) |
